# Supplementary material for: SARS-CoV-2, Tdap, and influenza vaccination during pregnancy from 2019 to 2022 in Ontario, Canada: a population-based retrospective cohort study
Source: PubMed Central journal article supplement — CMAJ. 2024 Oct 1;196(32):E1100–13. doi: 10.1503/cmaj.231522 (PMC11444691; doi:10.1503/cmaj.231522), 2024-10-01
Supplement: 231522-res-3-at.pdf [file 231522-res-3-at.pdf]

### Appendix 3. Timeline of lookback windows for outcomes of interest, by birth group

| Outcomes    |                         | Lookback Windows |        |        |        |        |        |        |        |        |        |        |        |
|-------------|-------------------------|------------------|--------|--------|--------|--------|--------|--------|--------|--------|--------|--------|--------|
|             |                         | Apr-18           | May-18 | Jun-18 | Jul-18 | Aug-18 | Sep-18 | Oct-18 | Nov-18 | Dec-18 | Jan-19 | Feb-19 | Mar-19 |
| 2019 births | Tdap vaccine record     | X                | X      | X      | X      | X      | X      | X      | X      | X      | X      | X      | X      |
|             |                         |                  |        |        |        |        |        |        |        |        |        |        |        |
| 2019/2020   |                         | Apr-19           | May-19 | Jun-19 | Jul-19 | Aug-19 | Sep-19 | Oct-19 | Nov-19 | Dec-19 | Jan-20 | Feb-20 | Mar-20 |
|             |                         | Apr-20           | May-20 | Jun-20 | Jul-20 | Aug-20 | Sep-20 | Oct-20 | Nov-20 | Dec-20 | Jan-21 | Feb-21 | Mar-21 |
| 2021 births | Tdap vaccine record     | X                | X      | X      | X      | X      | X      | X      | X      | X      | X      | X      | X      |
|             | Covid-19 vaccine record |                  |        |        |        |        |        |        |        | X      | X      | X      | X      |
|             |                         | Apr-21           | May-21 | Jun-21 | Jul-21 | Aug-21 | Sep-21 | Oct-21 | Nov-21 | Dec-21 | Jan-22 | Feb-22 | Mar-22 |
| 2022 births | Tdap vaccine record     | X                | X      | X      | X      | X      | X      | X      | X      | X      | X      | X      | X      |
|             | Covid-19 vaccine record | X                | X      | X      | X      | X      | X      | X      | X      | X      | X      | X      | X      |
|             |                         | Apr-22           | May-22 | Jun-22 | Jul-22 | Aug-22 | Sep-22 | Oct-22 | Nov-22 | Dec-22 | Jan-23 | Feb-23 | Mar-23 |
| 2022/2023   |                         | X                | X      | X      |        |        |        |        |        |        |        |        |        |

  

|                |                                                                                                                                                          |                                                                            |
|----------------|----------------------------------------------------------------------------------------------------------------------------------------------------------|----------------------------------------------------------------------------|
| <b>Legend:</b> | <span style="background-color: #d9ead3; border: 1px solid black; display: inline-block; width: 15px; height: 10px;"></span> Relevant to 2019 birth group | <span style="color: blue;">X</span> Relevant to Tdap vaccine outcome       |
|                | <span style="background-color: #fce4d6; border: 1px solid black; display: inline-block; width: 15px; height: 10px;"></span> Relevant to 2021 birth group | <span style="color: purple;">X</span> Relevant to Covid-19 vaccine outcome |
|                | <span style="background-color: #d9ead3; border: 1px solid black; display: inline-block; width: 15px; height: 10px;"></span> Relevant to 2022 birth group |                                                                            |
