# Supplementary material for: SARS-CoV-2, Tdap, and influenza vaccination during pregnancy from 2019 to 2022 in Ontario, Canada: a population-based retrospective cohort study
Source: PubMed Central journal article supplement — CMAJ. 2024 Oct 1;196(32):E1100–13. doi: 10.1503/cmaj.231522 (PMC11444691; doi:10.1503/cmaj.231522), 2024-10-01
Supplement: 231522-res-5-at.pdf [file 231522-res-5-at.pdf]

**Appendix 5. Adjusted vaccination analysis for birthing persons by age (<25 versus ≥25 years and age group)**

**Supplementary Table 1. Crude analysis of vaccine outcomes, birthing persons <25 versus ≥25 years**

| Outcomes                                                  | Tdap vaccination          | First SARS-CoV-2 dose     | Second SARS-CoV-2 dose    |
|-----------------------------------------------------------|---------------------------|---------------------------|---------------------------|
|                                                           | Relative risk<br>(95% CI) | Relative risk<br>(95% CI) | Relative risk<br>(95% CI) |
| Age<br><25 years <sup>a</sup>                             | 0.60 (0.57-0.63)          | 0.78 (0.76-0.81)          | 0.73 (0.70-0.75)          |
| <sup>a</sup> Birthing persons aged less than 25 years old |                           |                           |                           |

**Supplementary Table 2. Factors associated with Tdap vaccination among pregnant persons aged <25**

|                                                      | Adjusted Relative Risk <sup>b</sup><br>(95% CI) |
|------------------------------------------------------|-------------------------------------------------|
| <b>Birthing Group</b>                                |                                                 |
| 2019 birth <sup>a</sup>                              | -                                               |
| 2021 birth                                           | 1.46 (1.42-1.50)                                |
| 2022 birth                                           | 1.51 (1.47-1.55)                                |
| <b>Sociodemographic Characteristics</b>              |                                                 |
| <b>Age</b>                                           |                                                 |
| Mothers aged ≥25 <sup>a</sup>                        | -                                               |
| Mothers aged <25                                     | 0.60 (0.58-0.63)                                |
| <b>Rural residence</b>                               |                                                 |
|                                                      | 0.83 (0.78-0.87)                                |
| <b>Neighbourhood-level Ethnocultural composition</b> |                                                 |
|                                                      | -                                               |
| 1, least diversity <sup>a</sup>                      | 1.08 (1.04-1.13)                                |
| 2                                                    | 1.18 (1.14-1.23)                                |
| 3                                                    | 1.21 (1.16-1.26)                                |
| 4                                                    | 1.19 (1.15-1.24)                                |
| 5, greatest diversity                                |                                                 |
| <b>Neighbourhood-level Economic dependency</b>       |                                                 |
|                                                      | -                                               |
| 1, least dependency <sup>a</sup>                     | 0.96 (0.93-0.99)                                |
| 2                                                    | 0.91 (0.88-0.94)                                |
| 3                                                    | 0.88 (0.85-0.91)                                |
| 4                                                    | 0.85 (0.82-0.89)                                |
| 5, greatest dependency                               |                                                 |
| <b>Neighbourhood-level Residential instability</b>   |                                                 |
|                                                      | -                                               |
| 1, least instability <sup>a</sup>                    | 0.97 (0.94-1.01)                                |
| 2                                                    | 0.94 (0.91-0.98)                                |
| 3                                                    | 0.91 (0.88-0.95)                                |
| 4                                                    | 0.90 (0.87-0.93)                                |
| 5, greatest instability                              |                                                 |
| <b>Perinatal Health Services Contact</b>             |                                                 |

Appendix 5, as supplied by the authors. Appendix to: Greyson D, Correia R, Howard M, et al. SARS-CoV-2, Tdap, and influenza vaccination during pregnancy from 2019 to 2022 in Ontario, Canada: a population-based retrospective cohort study. *CMAJ* 2024. doi: 10.1503/cmaj.231522. Copyright © 2024 The Author(s) or their employer(s). To receive this resource in an accessible format, please contact us at [cmajgroup@cmaj.ca](mailto:cmajgroup@cmaj.ca).

|                                                                                                                                                                                                                                               |                  |
|-----------------------------------------------------------------------------------------------------------------------------------------------------------------------------------------------------------------------------------------------|------------------|
| <b>Use of assistive fertility for current pregnancy</b>                                                                                                                                                                                       | 1.02 (0.97-1.07) |
| <b>Early prenatal care visits<sup>c</sup></b>                                                                                                                                                                                                 | 1.04 (1.03-1.04) |
| <b>Parity</b>                                                                                                                                                                                                                                 |                  |
| 0 <sup>a</sup>                                                                                                                                                                                                                                | -                |
| 1                                                                                                                                                                                                                                             | 0.83 (0.81-0.85) |
| 2                                                                                                                                                                                                                                             | 0.65 (0.62-0.67) |
| 3 or more                                                                                                                                                                                                                                     | 0.47 (0.44-0.50) |
| <b>Prenatal care provider type</b>                                                                                                                                                                                                            |                  |
| Obstetrician <sup>a</sup>                                                                                                                                                                                                                     | -                |
| Family physician                                                                                                                                                                                                                              | 1.37 (1.34-1.41) |
| Midwife                                                                                                                                                                                                                                       | 1.04 (1.00-1.08) |
| Shared care                                                                                                                                                                                                                                   | 1.19 (1.12-1.26) |
| No care/Other                                                                                                                                                                                                                                 | 0.51 (0.43-0.60) |
| <sup>a</sup> Reference group                                                                                                                                                                                                                  |                  |
| <sup>b</sup> Adjusted for age group, rurality, CIMD measures (i.e., ethnocultural composition, economic dependency, residential instability, use of assistive fertility, early prenatal care visits, parity, and prenatal care provider type) |                  |
| <sup>c</sup> Early prenatal care visits occurred prior to 32 weeks of gestation.                                                                                                                                                              |                  |

**Supplementary Table 3. Factors associated with first and second SARS-CoV-2 vaccination, pregnant persons aged <25**

|                                                      | SARS-CoV-2 Dose 1                               | SARS-CoV-2 Dose 2                               |
|------------------------------------------------------|-------------------------------------------------|-------------------------------------------------|
|                                                      | Adjusted Relative Risk <sup>b</sup><br>(95% CI) | Adjusted Relative Risk <sup>b</sup><br>(95% CI) |
| <b>Sociodemographic Characteristics</b>              |                                                 |                                                 |
| <b>Age</b>                                           |                                                 |                                                 |
| Mothers aged ≥25 <sup>a</sup>                        | -                                               | -                                               |
| Mothers aged <25                                     | 0.92 (0.90-0.94)                                | 0.90 (0.88-0.91)                                |
| <b>Rural residence</b>                               | 0.97 (0.95-0.99)                                | 0.97 (0.95-0.98)                                |
| <b>Neighbourhood-level Ethnocultural composition</b> |                                                 |                                                 |
| 1, least diversity <sup>a</sup>                      | 0.99 (0.98-1.01)                                | 0.99 (0.98-1.01)                                |
| 2                                                    | 1.00 (0.98-1.01)                                | 1.00 (0.98-1.01)                                |
| 3                                                    | 1.00 (0.99-1.01)                                | 1.00 (0.98-1.01)                                |
| 4                                                    | 1.01 (0.99-1.02)                                | 1.00 (0.98-1.01)                                |
| 5, greatest diversity                                |                                                 |                                                 |
| <b>Neighbourhood-level Economic dependency</b>       |                                                 |                                                 |
| 1, least dependency <sup>a</sup>                     | 0.99 (0.98-1.00)                                | 1.00 (0.98-1.00)                                |
| 2                                                    | 0.98 (0.97-0.99)                                | 0.98 (0.97-0.99)                                |
| 3                                                    | 0.98 (0.96-0.99)                                | 0.97 (0.96-0.99)                                |
| 4                                                    | 0.97 (0.96-0.99)                                | 0.97 (0.96-0.99)                                |
| 5, greatest dependency                               | -                                               | -                                               |
| <b>Neighbourhood-level Residential instability</b>   |                                                 |                                                 |
| 1, least instability <sup>a</sup>                    | 1.00 (0.98-1.01)                                | 1.00 (0.98-1.01)                                |
| 2                                                    | 1.00 (0.99-1.01)                                | 1.00 (0.99-1.01)                                |
| 3                                                    | 0.99 (0.98-1.01)                                | 0.99 (0.98-1.01)                                |
| 4                                                    | 0.99 (0.97-1.00)                                | 0.99 (0.97-1.00)                                |

Appendix 5, as supplied by the authors. Appendix to: Greyson D, Correia R, Howard M, et al. SARS-CoV-2, Tdap, and influenza vaccination during pregnancy from 2019 to 2022 in Ontario, Canada: a population-based retrospective cohort study. *CMAJ* 2024. doi: 10.1503/cmaj.231522. Copyright © 2024 The Author(s) or their employer(s). To receive this resource in an accessible format, please contact us at [cmajgroup@cmaj.ca](mailto:cmajgroup@cmaj.ca).

|                                                                                                                                                                                                                                         |                   |                  |
|-----------------------------------------------------------------------------------------------------------------------------------------------------------------------------------------------------------------------------------------|-------------------|------------------|
| 5, greatest instability                                                                                                                                                                                                                 |                   |                  |
| <b>Perinatal Health Services Contact</b>                                                                                                                                                                                                |                   |                  |
| Use of assistive fertility for current pregnancy                                                                                                                                                                                        | 1.02 (1.00-1.04)  | 1.03 (1.01-1.04) |
| Early prenatal care visits <sup>c</sup>                                                                                                                                                                                                 | 1.00 (1.00-1.01)  | 1.01 (1.00-1.01) |
| <b>Parity</b>                                                                                                                                                                                                                           |                   |                  |
| 0 <sup>a</sup>                                                                                                                                                                                                                          | -                 | -                |
| 1                                                                                                                                                                                                                                       | 0.99 (0.98-1.00)  | 0.99 (0.98-1.00) |
| 2                                                                                                                                                                                                                                       | 0.95 (0.94-0.96)  | 0.94 (0.93-0.95) |
| 3 or more                                                                                                                                                                                                                               | 0.90 (0.89-0.92)  | 0.88 (0.86-0.90) |
| <b>Prenatal care provider type</b>                                                                                                                                                                                                      |                   |                  |
| Obstetrician <sup>a</sup>                                                                                                                                                                                                               | -                 | -                |
| Family physician                                                                                                                                                                                                                        | 1.007 (1.00-1.02) | 1.01 (1.00-1.02) |
| Midwife                                                                                                                                                                                                                                 | 1.002 (0.99-1.02) | 1.01 (0.99-1.02) |
| Shared care                                                                                                                                                                                                                             | 0.995 (0.97-1.02) | 1.00 (0.97-1.02) |
| No care/Other                                                                                                                                                                                                                           | 0.99 (0.96-1.03)  | 0.99 (0.95-1.03) |
| <sup>a</sup> Reference group                                                                                                                                                                                                            |                   |                  |
| <sup>b</sup> Adjusted for age, rurality, CIMD measures (i.e., ethnocultural composition, economic dependency, residential instability), use of assistive fertility, early prenatal care visits, parity, and prenatal care provider type |                   |                  |
| <sup>c</sup> Early prenatal care visits occurred prior to 32 weeks of gestation.                                                                                                                                                        |                   |                  |

**Supplementary Table 4. Factors associated with first and second SARS-CoV-2 vaccine among pregnant persons, by age group**

| SARS-CoV-2 vaccine dose                              | Dose 1                                          | Dose 2                                          |
|------------------------------------------------------|-------------------------------------------------|-------------------------------------------------|
|                                                      | Relative Risk<br>(95% CI)                       | Relative Risk<br>(95% CI)                       |
| <b>CRUDE ANALYSIS</b>                                |                                                 |                                                 |
| <b>Age group</b>                                     |                                                 |                                                 |
| <25 years                                            | 0.761 (0.74-0.79)                               | 0.71 (0.68-0.73)                                |
| 25 to 29 years                                       | 0.906 (0.89-0.92)                               | 0.90 (0.88-0.91)                                |
| 30 to 34 years <sup>a</sup>                          | -                                               | -                                               |
| 35 to 39 years                                       | 0.995 (0.98-1.01)                               | 1.00 (0.99-1.02)                                |
| >40 years                                            | 0.990 (0.97-1.01)                               | 0.99 (0.96-1.02)                                |
| <b>ADJUSTED ANALYSIS</b>                             |                                                 |                                                 |
|                                                      | Adjusted Relative Risk <sup>b</sup><br>(95% CI) | Adjusted Relative Risk <sup>b</sup><br>(95% CI) |
| <b>Sociodemographic Characteristics</b>              |                                                 |                                                 |
| <b>Age group</b>                                     |                                                 |                                                 |
| <25 years                                            | 0.91 (0.89-0.93)                                | 0.88 (0.87-0.90)                                |
| 25 to 29 years                                       | 0.97 (0.96-0.98)                                | 0.96 (0.95-0.97)                                |
| 30 to 34 years <sup>a</sup>                          | -                                               | -                                               |
| 35 to 39 years                                       | 1.00 (0.99-1.02)                                | 1.01 (1.00-1.02)                                |
| >40 years                                            | 1.01 (0.99-1.03)                                | 1.01 (0.99-1.03)                                |
| <b>Rural residence</b>                               | 0.97 (0.95-0.99)                                | 0.97 (0.95-0.99)                                |
| <b>Neighbourhood-level Ethnocultural composition</b> |                                                 |                                                 |
|                                                      | -                                               | -                                               |
| 1, least diversity <sup>a</sup>                      | 0.99 (0.98-1.01)                                | 0.99 (0.98-1.01)                                |
| 2                                                    | 0.99 (0.98-1.01)                                | 0.99 (0.98-1.01)                                |

|                                                                                                                                                                                                                                                                                                                                                                   |                  |                    |
|-------------------------------------------------------------------------------------------------------------------------------------------------------------------------------------------------------------------------------------------------------------------------------------------------------------------------------------------------------------------|------------------|--------------------|
| 3                                                                                                                                                                                                                                                                                                                                                                 | 1.00 (0.98-1.01) | 0.99 (0.98-1.01)   |
| 4                                                                                                                                                                                                                                                                                                                                                                 | 1.00 (0.98-1.02) | 0.99 (0.98-1.01)   |
| 5, greatest diversity                                                                                                                                                                                                                                                                                                                                             | -                | -                  |
| <b>Neighbourhood-level Economic dependency</b>                                                                                                                                                                                                                                                                                                                    | 0.99 (0.98-1.00) | 0.99 (0.978-1.002) |
| 1, least dependency <sup>a</sup>                                                                                                                                                                                                                                                                                                                                  | 0.98 (0.97-1.00) | 0.98 (0.967-0.992) |
| 2                                                                                                                                                                                                                                                                                                                                                                 | 0.98 (0.97-0.99) | 0.98 (0.962-0.988) |
| 3                                                                                                                                                                                                                                                                                                                                                                 | 0.98 (0.96-0.99) | 0.97 (0.96-0.989)  |
| 4                                                                                                                                                                                                                                                                                                                                                                 | -                | -                  |
| 5, greatest dependency                                                                                                                                                                                                                                                                                                                                            | -                | -                  |
| <b>Neighbourhood-level Residential instability</b>                                                                                                                                                                                                                                                                                                                | 1.00 (0.99-1.01) | 1.00 (0.983-1.012) |
| 1, least instability <sup>a</sup>                                                                                                                                                                                                                                                                                                                                 | 1.00 (0.99-1.02) | 1.00 (0.988-1.016) |
| 2                                                                                                                                                                                                                                                                                                                                                                 | 1.00 (0.98-1.01) | 1.00 (0.982-1.011) |
| 3                                                                                                                                                                                                                                                                                                                                                                 | 0.99 (0.98-1.00) | 0.99 (0.974-1.004) |
| 4                                                                                                                                                                                                                                                                                                                                                                 | -                | -                  |
| 5, greatest instability                                                                                                                                                                                                                                                                                                                                           | -                | -                  |
| <b>Perinatal Health Services Contact</b>                                                                                                                                                                                                                                                                                                                          |                  |                    |
| <b>Use of assistive fertility for current pregnancy</b>                                                                                                                                                                                                                                                                                                           | 1.01 (0.99-1.03) | 1.01 (0.99-1.03)   |
| <b>Early prenatal care visits <sup>c</sup></b>                                                                                                                                                                                                                                                                                                                    | 1.00 (1.00-1.01) | 1.01 (1.00-1.01)   |
| <b>Parity</b>                                                                                                                                                                                                                                                                                                                                                     | -                | -                  |
| 0 <sup>a</sup>                                                                                                                                                                                                                                                                                                                                                    | -                | -                  |
| 1                                                                                                                                                                                                                                                                                                                                                                 | 0.99 (0.98-1.00) | 0.98 (0.97-0.99)   |
| 2                                                                                                                                                                                                                                                                                                                                                                 | 0.94 (0.93-0.96) | 0.93 (0.92-0.94)   |
| 3 or more                                                                                                                                                                                                                                                                                                                                                         | 0.89 (0.88-0.91) | 0.87 (0.85-0.89)   |
| <b>Prenatal care provider type</b>                                                                                                                                                                                                                                                                                                                                | -                | -                  |
| FP/GP                                                                                                                                                                                                                                                                                                                                                             | 1.01 (1.00-1.02) | 1.01 (1.00-1.02)   |
| Midwife                                                                                                                                                                                                                                                                                                                                                           | 1.00 (0.99-1.02) | 1.01 (0.99-1.02)   |
| OB/GYN                                                                                                                                                                                                                                                                                                                                                            | -                | -                  |
| No care/Other/Missing                                                                                                                                                                                                                                                                                                                                             | 0.99 (0.96-1.03) | 0.99 (0.95-1.03)   |
| Shared care                                                                                                                                                                                                                                                                                                                                                       | 1.00 (0.97-1.02) | 1.00 (0.97-1.02)   |
| <sup>a</sup> Reference group<br><sup>b</sup> Adjusted for age group, rurality, CIMD measures (i.e., ethnocultural composition, economic dependency, residential instability), use of assistive fertility, early prenatal care visits, parity, and prenatal care provider type<br><sup>c</sup> Early prenatal care visits occurred prior to 32 weeks of gestation. |                  |                    |
