# Supplementary material for: SARS-CoV-2, Tdap, and influenza vaccination during pregnancy from 2019 to 2022 in Ontario, Canada: a population-based retrospective cohort study
Source: PubMed Central journal article supplement — CMAJ. 2024 Oct 1;196(32):E1100–13. doi: 10.1503/cmaj.231522 (PMC11444691; doi:10.1503/cmaj.231522), 2024-10-01
Supplement: 231522-res-6-at.pdf [file 231522-res-6-at.pdf]

**Appendix 6. SARS-CoV-2 vaccination analysis hard-matched on age**

**Supplementary Table 5. SARS-CoV-2 vaccination among birthing persons <25 years**

|                                                                                         | <b>Unadjusted Model</b>           | <b>Adjusted Matched Model</b>              |
|-----------------------------------------------------------------------------------------|-----------------------------------|--------------------------------------------|
|                                                                                         | <b>Relative Risk<br/>(95% CI)</b> | <b>Adjusted Relative Risk<br/>(95% CI)</b> |
| <b>SARS-CoV-2 vaccine</b>                                                               |                                   |                                            |
| First dose <sup>a</sup>                                                                 | 0.71 (0.69-0.74)                  | 0.78 (0.75-0.81)                           |
| Second dose <sup>a</sup>                                                                | 0.65 (0.62-0.67)                  | 0.71 (0.69-0.74)                           |
| <sup>a</sup> Vaccine records were examined between December 1, 2020, and June 30, 2022. |                                   |                                            |

**Supplementary Table 6. Factors associated with first and second SARS-CoV-2 vaccine doses (<25 years and general population – Unmatched cohort)**

|                                                          | <b>SARS-CoV-2 Dose 1</b>                   | <b>SARS-CoV-2 Dose 2</b>                   |
|----------------------------------------------------------|--------------------------------------------|--------------------------------------------|
|                                                          | <b>Adjusted Relative Risk<br/>(95% CI)</b> | <b>Adjusted Relative Risk<br/>(95% CI)</b> |
| <b>Population Group</b>                                  |                                            |                                            |
| <b>Group</b>                                             |                                            |                                            |
| Not pregnant <sup>a</sup>                                | -                                          | -                                          |
| 2022 birth group                                         | 0.77 (0.75-0.79)                           | 0.71 (0.68-0.74)                           |
| <b>Sociodemographic Characteristics</b>                  |                                            |                                            |
| <b>Age (years)</b>                                       | 1.00 (1.00-1.00)                           | 1.00 (1.00-1.00)                           |
| <b>Rural residence</b>                                   | 0.96 (0.95-0.96)                           | 0.95 (0.94-0.95)                           |
| <b>Neighbourhood-level<br/>Ethnocultural composition</b> | -                                          | -                                          |
| 1, least diversity <sup>a</sup>                          | 1.00 (1.00-1.01)                           | 1.00 (1.00-1.01)                           |
| 2                                                        | 1.01 (1.00-1.01)                           | 1.01 (1.00-1.01)                           |
| 3                                                        | 1.01 (1.00-1.01)                           | 1.01 (1.01-1.01)                           |
| 4                                                        | 1.01 (1.00-1.01)                           | 1.01 (1.01-1.02)                           |
| 5, greatest diversity                                    |                                            |                                            |
| <b>Neighbourhood-level Economic<br/>dependency</b>       | -                                          | -                                          |
| 1, least dependency <sup>a</sup>                         | 0.99 (0.98-0.99)                           | 0.98 (0.98-0.99)                           |
| 2                                                        | 0.99 (0.98-0.99)                           | 0.98 (0.97-0.98)                           |
| 3                                                        | 0.98 (0.98-0.98)                           | 0.98 (0.97-0.98)                           |
| 4                                                        |                                            |                                            |
| 5, greatest dependency                                   | -                                          | -                                          |
| <b>Neighbourhood-level Residential<br/>instability</b>   | 0.99 (0.99-0.99)                           | 0.99 (0.99-0.99)                           |
| 1, least instability <sup>a</sup>                        | 0.98 (0.98-0.99)                           | 0.98 (0.98-0.98)                           |
| 2                                                        | 0.98 (0.97-0.98)                           | 0.97 (0.97-0.97)                           |
| 3                                                        | 0.96 (0.96-0.97)                           | 0.95 (0.95-0.95)                           |
| 4                                                        |                                            |                                            |
| 5, greatest instability                                  |                                            |                                            |
| <b>Perinatal Health Services Contact</b>                 |                                            |                                            |
| <b>Parity</b>                                            |                                            |                                            |
| 0 <sup>a</sup>                                           | -                                          | -                                          |

Appendix 6, as supplied by the authors. Appendix to: Greyson D, Correia R, Howard M, et al. SARS-CoV-2, Tdap, and influenza vaccination during pregnancy from 2019 to 2022 in Ontario, Canada: a population-based retrospective cohort study. *CMAJ* 2024. doi: 10.1503/cmaj.231522. Copyright © 2024 The Author(s) or their employer(s). To receive this resource in an accessible format, please contact us at [cmajgroup@cmaj.ca](mailto:cmajgroup@cmaj.ca).

|                              |                  |                  |
|------------------------------|------------------|------------------|
| 1                            | 0.81 (0.80-0.82) | 0.76 (0.75-0.77) |
| 2                            | 0.74 (0.73-0.76) | 0.69 (0.67-0.70) |
| 3 or more                    | 0.69 (0.66-0.72) | 0.61 (0.57-0.64) |
| <sup>a</sup> Reference group |                  |                  |
