# Supplementary figures and images for: SARS-CoV-2, Tdap, and influenza vaccination during pregnancy from 2019 to 2022 in Ontario, Canada: a population-based retrospective cohort study
Source: PubMed Central journal article supplement — CMAJ. 2024 Oct 1;196(32):E1100–13. doi: 10.1503/cmaj.231522 (PMC11444691; doi:10.1503/cmaj.231522), 2024-10-01

#### Appendix 4. Timing of SARS-CoV-2 vaccination, by birth month

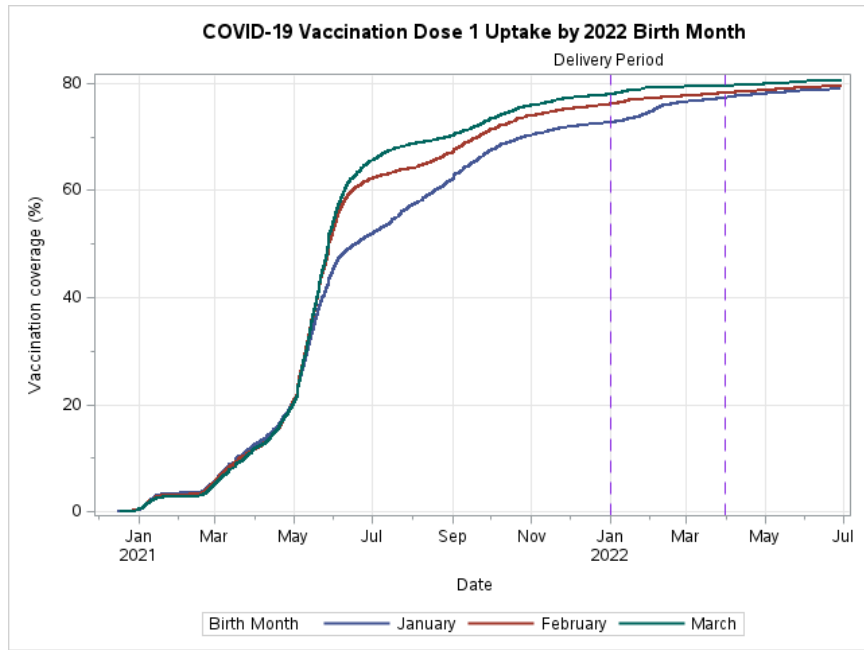

Supplement: 231522-res-4-at.pdf [file 231522-res-4-at.pdf]
